# Supplementary material
Source: HighWire-hosted journal article supplement (https://drc.bmj.com/content/9/1/e001698)
Supplement: inline-supplementary-material-4 [file inline-supplementary-material-4.pdf]

**Table S3 - Association between leukocyte subsets and sural sensory nerve action potential (SNAP) amplitude**

|                                | Model 1 |                 |          | Model 2 |                 |          | Model 3 |                 |          |
|--------------------------------|---------|-----------------|----------|---------|-----------------|----------|---------|-----------------|----------|
|                                | $\beta$ | 95% CI          | <i>P</i> | $\beta$ | 95% CI          | <i>P</i> | $\beta$ | 95% CI          | <i>P</i> |
| <b>Monocytes</b>               | 0.050   | (-0.196; 0.297) | 0.690    | 0.031   | (-0.216; 0.280) | 0.801    | 0.039   | (-0.210; 0.289) | 0.756    |
| <b>Basophils</b>               | 0.106   | (-0.812; 1.024) | 0.820    | 0.043   | (-0.879; 0.966) | 0.926    | 0.192   | (-0.752; 1.138) | 0.689    |
| <b>Eosinophils</b>             | -0.099  | (-0.353; 0.153) | 0.439    | -0.097  | (-0.351; 0.155) | 0.448    | -0.082  | (-0.337; 0.173) | 0.527    |
| <b>Neutrophils</b>             | 0.021   | (-0.039; 0.082) | 0.483    | 0.026   | (-0.035; 0.087) | 0.402    | 0.003   | (-0.059; 0.067) | 0.905    |
| <b>Lymphocytes</b>             | -0.026  | (-0.092; 0.039) | 0.424    | -0.030  | (-0.096; 0.035) | 0.363    | -0.007  | (-0.075; 0.061) | 0.832    |
| <b>T cells</b>                 | -0.016  | (-0.073; 0.041) | 0.577    | -0.015  | (-0.073; 0.041) | 0.585    | -0.023  | (-0.081; 0.034) | 0.433    |
| <b>CD4<sup>+</sup> T cells</b> | 0.008   | (-0.034; 0.052) | 0.690    | 0.014   | (-0.029; 0.058) | 0.517    | 0.015   | (-0.029; 0.059) | 0.506    |
| <b>CD8<sup>+</sup> T cells</b> | -0.007  | (-0.055; 0.041) | 0.767    | -0.014  | (-0.062; 0.034) | 0.571    | -0.012  | (-0.061; 0.036) | 0.616    |
| <b>T reg cells</b>             | 0.140   | (-0.118; 0.400) | 0.286    | 0.130   | (-0.129; 0.390) | 0.325    | 0.085   | (-0.180; 0.350) | 0.528    |
| <b>B cells</b>                 | 0.004   | (-0.103; 0.111) | 0.938    | 0.002   | (-0.104; 0.110) | 0.959    | 0.005   | (-0.102; 0.114) | 0.919    |

**Model 1:** adjusted for sex and age.

**Model 2:** adjusted for model 1+ glucose metabolism status.

**Model 3:** adjusted for model 2 + BMI, HbA1c, total cholesterol, triglycerides, eGFR, hypertension, history of CVD, glucose-lowering drugs, lipid-lowering drugs, nonsteroidal anti-inflammatory drugs, smoking and alcohol consumption.

CI, confidence interval
