# Supplementary material
Source: HighWire-hosted journal article supplement (https://drc.bmj.com/content/9/1/e001698)
Supplement: inline-supplementary-material-5 [file inline-supplementary-material-5.pdf]

**Table S4 - Association of leukocyte subsets with nerve conduction velocity (NCV) sum score stratified by glucose metabolism status.**

|                   |                          | Normal glucose metabolism |                  | Prediabetes |                 | Type 2 diabetes |                  | $p_{\text{interaction}}$ |
|-------------------|--------------------------|---------------------------|------------------|-------------|-----------------|-----------------|------------------|--------------------------|
| Leukocyte subset  |                          | $\beta$                   | 95% CI           | $\beta$     | 95% CI          | $\beta$         | 95% CI           |                          |
| Innate immunity   | Monocytes                | -0.005                    | (-0.038; 0.027)  | 0.010       | (-0.068; 0.089) | -0.016          | (-0.065; 0.032)  | 0.736                    |
|                   | Basophils                | -0.096                    | (-0.214; 0.021)  | 0.029       | (-0.270; 0.329) | -0.241          | (-0.433; -0.049) | 0.367                    |
|                   | Eosinophils              | 0.008                     | (-0.023; 0.041)  | -0.021      | (-0.104; 0.060) | -0.015          | (-0.042; 0.040)  | 0.370                    |
|                   | Neutrophils              | -0.005                    | (-0.013; 0.002)  | 0.006       | (-0.013; 0.027) | -0.0001         | (-0.015; 0.012)  | 0.864                    |
| Adaptive immunity | Lymphocytes              | 0.006                     | (-0.002; 0.014)  | -0.009      | (-0.031; 0.013) | 0.005           | (-0.009; 0.020)  | 0.618                    |
|                   | T cells                  | 0.0006                    | (-0.007; 0.008)  | 0.0005      | (-0.020; 0.021) | 0.007           | (-0.003; 0.018)  | 0.757                    |
|                   | CD4 <sup>+</sup> T cells | -0.008                    | (-0.015; -0.002) | -0.002      | (-0.015; 0.010) | -0.006          | (-0.014; 0.001)  | 0.729                    |
|                   | CD8 <sup>+</sup> T cells | 0.007                     | (0.0002; 0.014)  | 0.002       | (-0.012; 0.016) | 0.006           | (-0.002; 0.015)  | 0.523                    |
|                   | T reg cells              | -0.020                    | (-0.054; 0.013)  | 0.010       | (-0.083; 0.104) | 0.005           | (-0.048; 0.059)  | 0.832                    |
|                   | B cells                  | 0.0003                    | (-0.012; 0.013)  | -0.017      | (-0.052; 0.017) | -0.005          | (-0.026; 0.014)  | 0.548                    |

NCV sum score is defined as a continuous variable calculated based on available NCV in at least one nerve.

Associations were adjusted for sex, age, BMI, HbA1c, total cholesterol, triglycerides, eGFR, hypertension, history of CVD, glucose-lowering drugs, lipid-lowering drugs, nonsteroidal anti-inflammatory drugs, smoking, and alcohol consumption. CI, confidence interval

Prediabetes was defined as impaired fasting glucose and/or impaired glucose tolerance based on World Health Organization 2006 criteria.
